# Supplementary material for: Giant magnetoresistive biosensors for real-time quantitative detection of protease activity
Source: PubMed Central journal article supplement (PMC7224196; doi:10.1038/s41598-020-62910-2), 2020-05-14

**a)**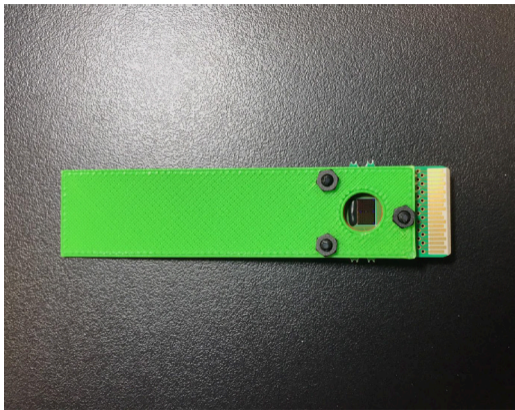**b)**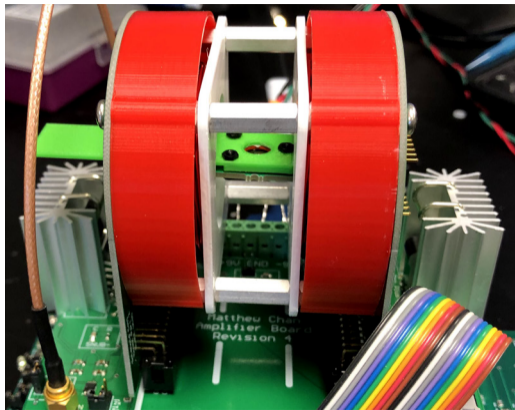

Supplement: 41598_2020_62910_MOESM1_ESM.pdf [file 41598_2020_62910_MOESM1_ESM.pdf]
